# Supplementary material for: Impact of Olive Oil Supplement Intake on Dendritic Cell Maturation after Strenuous Physical Exercise: A Preliminary Study
Source: MDPI journal article supplement (doi:10.3390/ijerph18084128), 2021-04-14
Supplement: s1 [file s1]

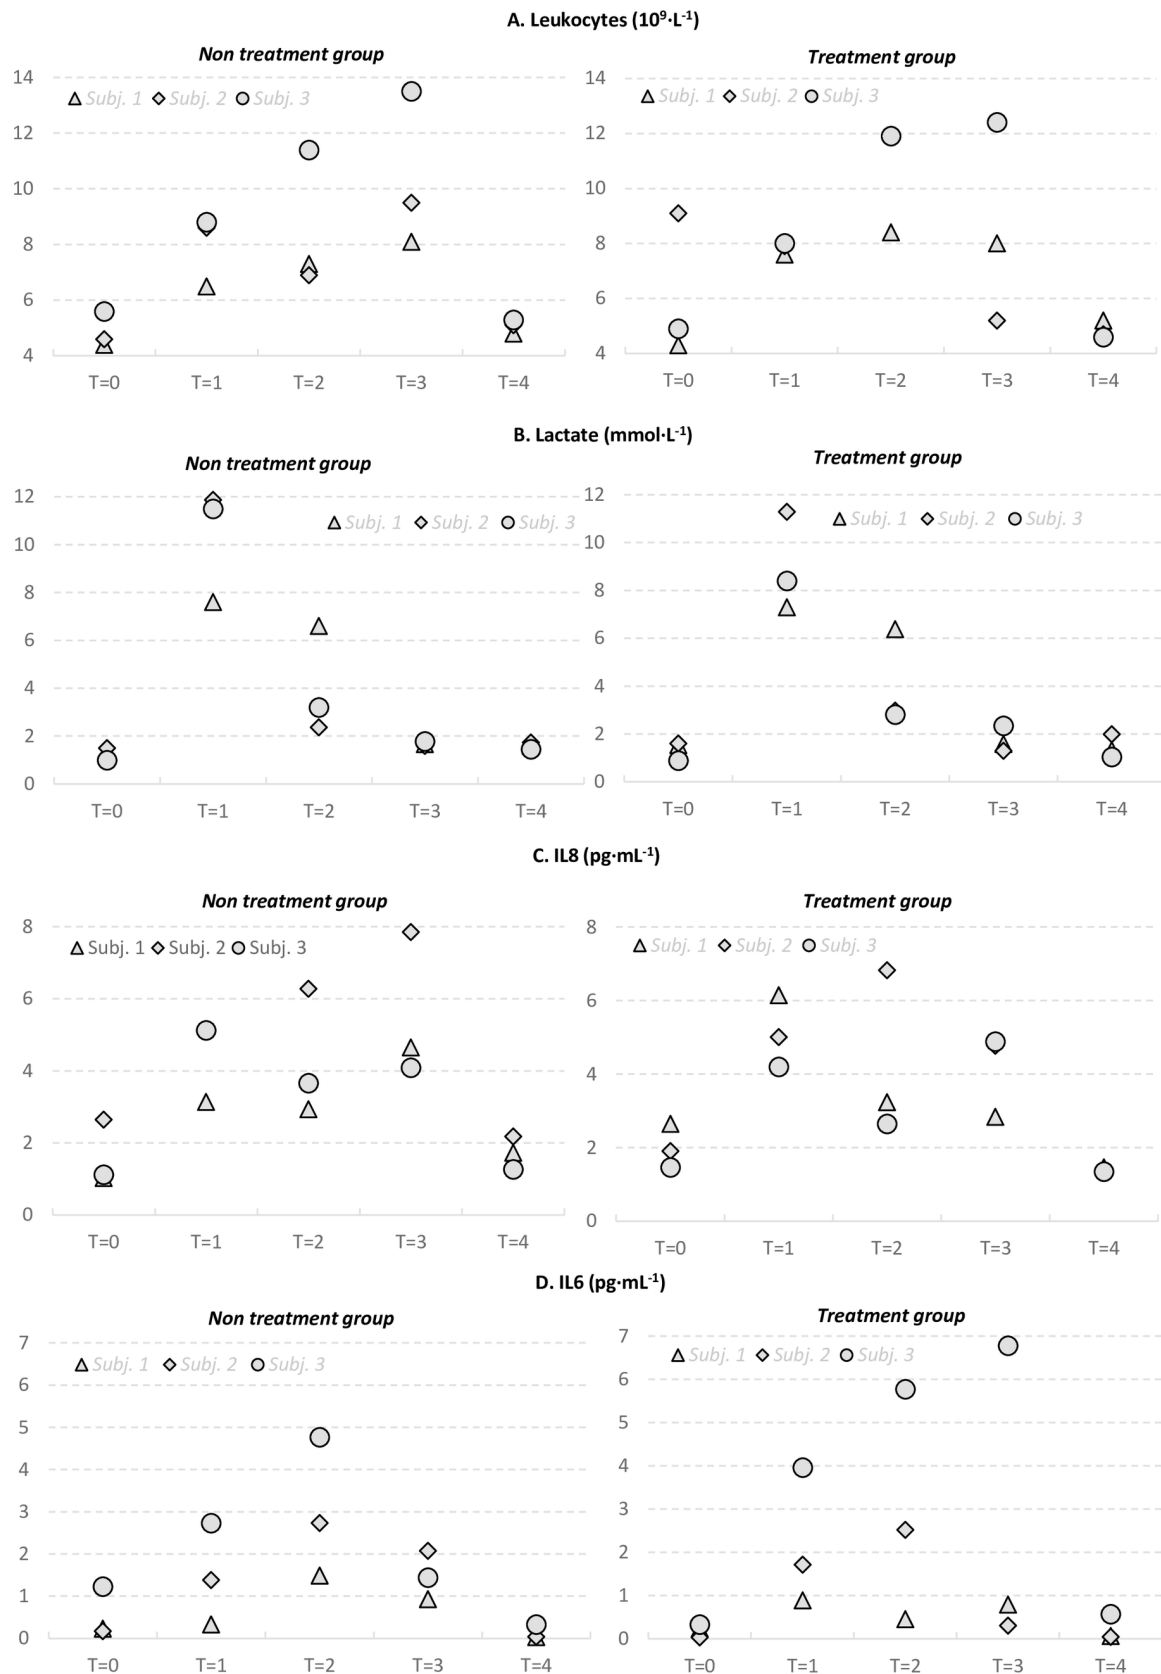

**Figure S1.** Impact of olive oil supplement on **A.** Leukocytes ( $10^9 \cdot L^{-1}$ ), **B.** Lactate ( $mmol \cdot L^{-1}$ ), **C.** IL8 ( $pg \cdot mL^{-1}$ ), **D.** IL6 ( $pg \cdot mL^{-1}$ ) during and after intense exercise.
